# Supplementary material for: A theoretical investigation of the vibrational states of HCO2? and its isotopomers
Source: Royal Society of Chemistry journal article supplement (doi:10.1039/b417942k), 2005-01-01
Supplement: b417942k.pdf [file b417942k.pdf]

## Supplementary electronic material

The CCSD(T)/aug-cc-pVQZ potential energy surface (PES) for  $\text{HCO}_2^-$  is given by the expression

$$V = \sum_{i,j,k,l,m,n} C_{ijklmn} \varrho_1^i \varrho_2^j \varrho_3^k \Delta\beta_1^l \Delta\beta_2^m \cos(n\tau), \quad (1)$$

with the constraint that

$$C_{ijklmn} = C_{ikjmln}. \quad (2)$$

In eqn. (1), the stretching coordinates  $\varrho_i$  are defined as

$$\varrho_i = \frac{1}{a_i} \{1 - \exp[-a_i(R_i/R_i^e - 1)]\}, \quad (i = 1, 2, 3). \quad (3)$$

The displacement coordinates  $\Delta\beta_i = \beta_i(\text{HCO}) - \beta_e$  ( $i = 1, 2$ ) and the torsional angle  $\tau$  are employed to describe the angular dependence of the PES.

The non-linear parameters  $a_1 - a_3$  and the linear parameters  $C_{ijklmn}$  were determined by means of least-squares fitting techniques. The latter are collected in Table 1, while the former have values of  $a_1 = 0.9047$  and  $a_2 = a_3 = 0.8455$ .

Table 1: Linear parameters of the analytical CCSD(T)/avqz potential energy surface for  $\text{HCO}_2^-$  (all coefficients in atomic units).

| ijklmn | coefficient | ijklmn | coefficient | ijklmn | coefficient |
|--------|-------------|--------|-------------|--------|-------------|
| 200000 | 0.60411735  | 022000 | 0.17371784  | 011020 | 0.50699093  |
| 300000 | -0.92903060 | 010100 | -0.25005765 | 012001 | -0.69521692 |
| 400000 | 0.60798143  | 010200 | -0.41782498 | 012010 | -0.82126819 |
| 500000 | -0.32558919 | 010300 | -0.08173401 | 012100 | -0.84954812 |
| 600000 | 0.29303321  | 020100 | 0.05671403  | 100110 | -0.07751958 |
| 700000 | -0.15468989 | 020200 | -0.09688389 | 100120 | 0.07231911  |
| 020000 | 1.86944908  | 020300 | 0.21745529  | 101001 | -0.11965152 |
| 030000 | -3.43006023 | 030100 | -0.07467478 | 101010 | -0.36239916 |
| 040000 | 3.80766338  | 030200 | 0.23877952  | 101100 | -0.19629833 |
| 050000 | -2.93800745 | 010010 | -0.60402448 | 101110 | 0.29376874  |
| 060000 | 1.46768403  | 010020 | -0.25621337 | 101200 | 0.09807025  |
| 000100 | 0.36825295  | 010030 | -0.11039726 | 102010 | 0.37152867  |
| 000200 | 0.26461450  | 020010 | 0.10395274  | 102100 | 0.15540445  |
| 000300 | 0.10657421  | 020020 | 0.22362982  | 200110 | -0.10380086 |

*Continued on next page*

Table 1 continued

| ijklmn | coefficient | ijklmn | coefficient | ijklmn | coefficient |
|--------|-------------|--------|-------------|--------|-------------|
| 000400 | 0.07209887  | 020030 | 0.15385217  | 201001 | -0.04706539 |
| 000500 | 0.03260729  | 030010 | 0.02622335  | 201010 | -0.21974640 |
| 000001 | -0.21504143 | 010001 | 0.25754803  | 201100 | -0.07289553 |
| 000002 | -0.42412138 | 010002 | 0.42516820  | 001130 | -0.16468244 |
| 000003 | -0.31673596 | 010003 | 0.20559179  | 001202 | 0.01854882  |
| 000004 | -0.13993328 | 010004 | 0.03797096  | 001220 | -0.24378070 |
| 000005 | -0.03681967 | 020001 | 0.10374180  | 001301 | 0.05231784  |
| 000006 | -0.00454386 | 030001 | 0.09490720  | 001310 | -0.15490938 |
| 110000 | 0.06616818  | 000110 | 0.34149723  | 002120 | 0.28400823  |
| 120000 | -0.32402580 | 000120 | 0.20480511  | 002201 | 0.27706003  |
| 130000 | 0.15608035  | 000130 | 0.22411878  | 002210 | 0.25683026  |
| 210000 | 0.08035471  | 000140 | 0.13570605  | 011030 | 0.68699040  |
| 220000 | -0.12876314 | 000220 | 0.30157110  | 022010 | 0.71487810  |
| 230000 | -0.31408452 | 000230 | 0.29929593  | 100130 | -0.07374925 |
| 310000 | -0.12836874 | 000101 | 0.46216655  | 100220 | -0.05609019 |
| 320000 | 0.23932424  | 000102 | 0.10972238  | 101021 | -0.33706014 |
| 410000 | -0.19020814 | 000103 | 0.01580873  | 101030 | -0.25345716 |
| 100100 | 0.08883353  | 000201 | 0.04281523  | 101120 | -0.30744575 |
| 100200 | -0.07511848 | 000202 | 0.02606821  | 101210 | -0.18602800 |
| 100300 | 0.05638057  | 000301 | 0.08529859  | 101300 | -0.11319956 |
| 200100 | 0.08854630  | 111000 | -0.07841360 | 102002 | -0.02940705 |
| 200200 | -0.08337456 | 211000 | 0.25638035  | 102020 | -0.35052311 |
| 200300 | 0.09215879  | 001011 | -0.24740082 | 102200 | 0.06428430  |
| 300100 | -0.04296715 | 001101 | -0.52809782 | 103010 | 0.25308530  |
| 400100 | -0.08547400 | 001102 | -0.07434050 | 103100 | 0.38850388  |
| 100001 | -0.01566040 | 001110 | -0.49311362 | 200120 | 0.10906059  |
| 100002 | -0.02066568 | 001120 | -0.52736014 | 201020 | 0.09986366  |
| 100003 | -0.00500544 | 001210 | -0.54273868 | 201110 | -0.16492925 |
| 200001 | 0.02396423  | 002101 | -0.09043350 | 201200 | -0.09024760 |
| 300001 | -0.06677819 | 002110 | -0.18196382 | 202010 | -0.21888750 |
| 011000 | 2.07054392  | 011001 | 1.90586642  | 202100 | -0.36577884 |
| 012000 | -1.12789054 | 011002 | 0.34012550  | 300110 | 0.13369673  |
| 013000 | 0.21528270  | 011010 | 0.61160972  | 301010 | 0.24506449  |
| 301100 | 0.23569490  |        |             |        |             |

Table 2: Dissociation reaction  $\text{HCO}_2^- \longrightarrow \text{H}^- + \text{CO}_2$ . Points on minimum energy path.

| $r(\text{CH})/\text{\AA}$ | $R_{opt}/\text{\AA}$ | $\alpha_{opt}/^\circ$ | $E_{opt}/\text{cm}^{-1}$ |
|---------------------------|----------------------|-----------------------|--------------------------|
| $\infty$                  | 1.1631               | 180                   | 19872                    |
| 5.0                       | 1.1632               | 178.1                 | 19218                    |
| 4.5                       | 1.1633               | 177.6                 | 18979                    |
| 4.0                       | 1.1635               | 177.0                 | 18641                    |
| 3.75                      | 1.1638               | 176.5                 | 18425                    |
| 3.5                       | 1.1640               | 175.9                 | 18175                    |
| 3.375                     | 1.1642               | 175.5                 | 18036                    |
| 3.25                      | 1.1645               | 175.0                 | 17890                    |
| 3.125                     | 1.1648               | 174.3                 | 17737                    |
| 3.0                       | 1.1653               | 173.5                 | 17577                    |
| 2.875                     | 1.1660               | 172.5                 | 17412                    |
| 2.75                      | 1.1669               | 171.0                 | 17239                    |
| 2.625                     | 1.1684               | 169.1                 | 17052                    |
| 2.5                       | 1.1708               | 166.4                 | 16831                    |
| 2.375                     | 1.1751               | 162.5                 | 16528                    |
| 2.25                      | 1.1819               | 157.5                 | 16050                    |
| 2.125                     | 1.1907               | 152.1                 | 15279                    |
| 2.0                       | 1.1995               | 147.6                 | 14156                    |
| 1.875                     | 1.2075               | 144.0                 | 12675                    |
| 1.75                      | 1.2152               | 141.0                 | 10835                    |
| 1.625                     | 1.2227               | 138.3                 | 8635                     |
| 1.5                       | 1.2305               | 135.9                 | 6115                     |
| 1.375                     | 1.2385               | 133.7                 | 3446                     |
| 1.25                      | 1.2464               | 131.8                 | 1080                     |
| 1.12936                   | 1.25351              | 130.18                | 0                        |
| 1.0                       | 1.2602               | 128.8                 | 2170                     |
| 0.9                       | 1.2644               | 128.1                 | 8679                     |
| 0.8                       | 1.2676               | 127.5                 | 23061                    |
